# Supplementary material for: Deciphering the Prognostic Efficacy of MRI Radiomics in Nasopharyngeal Carcinoma: A Comprehensive Meta-Analysis
Source: MDPI journal article supplement (doi:10.3390/diagnostics14090924), 2024-04-29
Supplement: s1 [file s1]

# Deciphering the Prognostic Efficacy of MRI Radiomics in Nasopharyngeal Carcinoma: A Comprehensive Meta-Analysis

Chih-Keng Wang, Ting-Wei Wang, Chia-Fung Lu, Yu-Te Wu, Man-Wei Hua

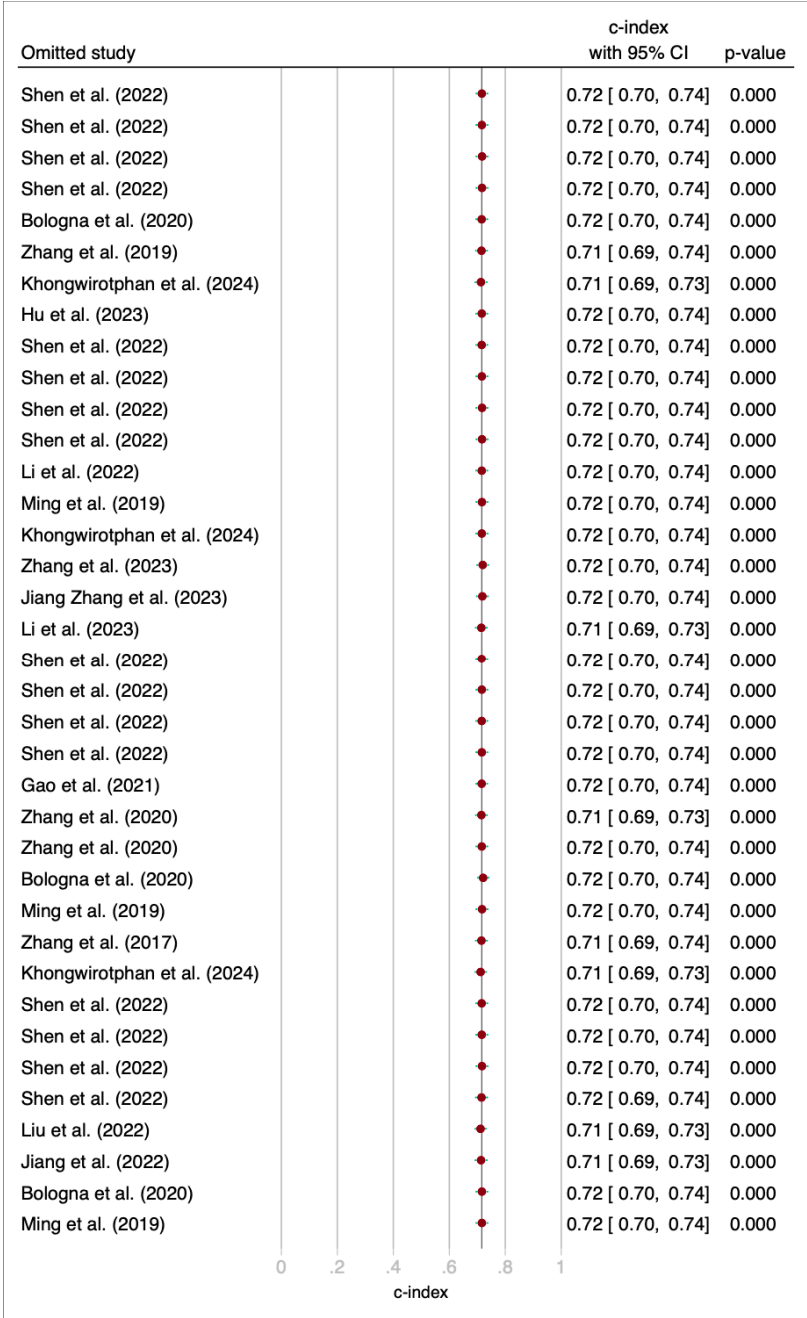

Figure S1: Sensitivity analysis of radiomics prognosis models' c-index with leave one out method.

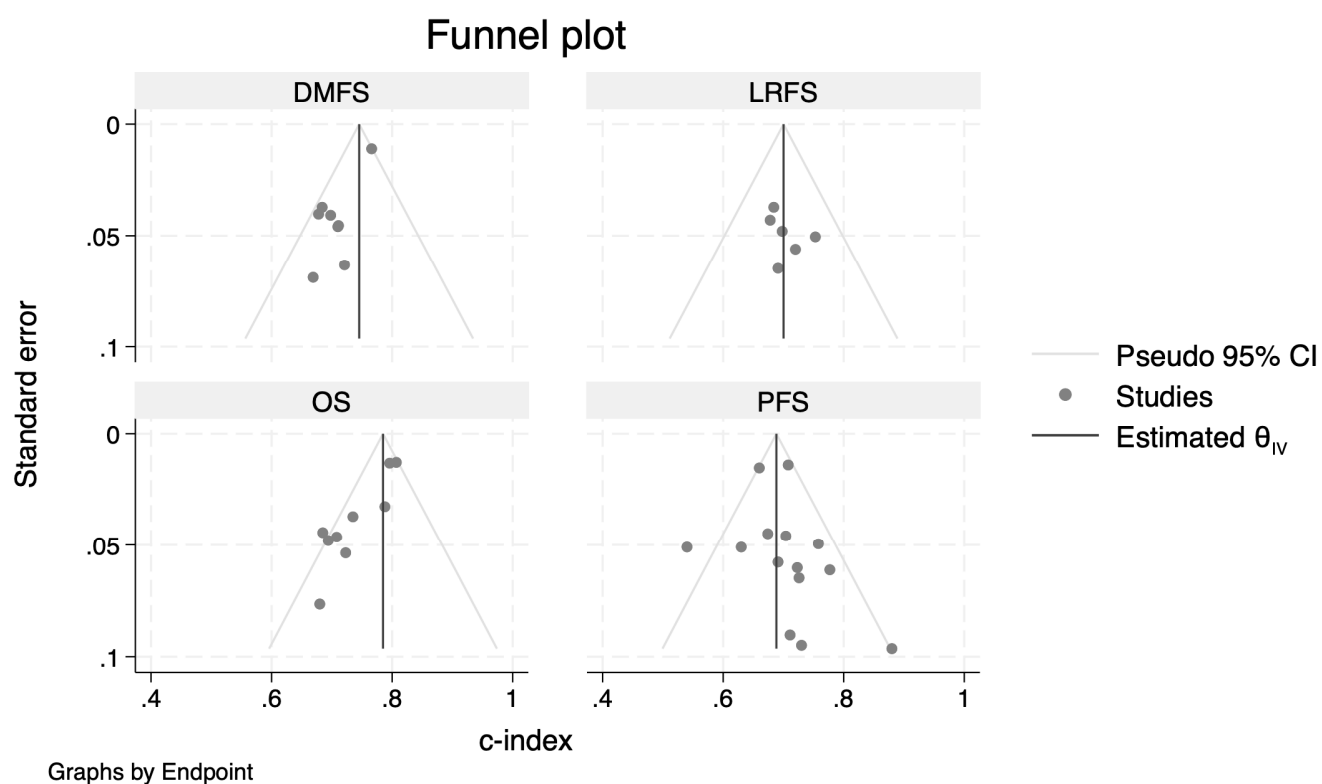

**Figure S2:** Funnel plot of radiomics prognosis models' c-index group by different endpoint (Egger test:  $p=0.14$ )

**Table S1. PRISMA Checklist**

| Section and Topic             | Item# | Checklist item                                                                                                                                                                                                                                                                                       | Location where item is reported |
|-------------------------------|-------|------------------------------------------------------------------------------------------------------------------------------------------------------------------------------------------------------------------------------------------------------------------------------------------------------|---------------------------------|
| TITLE                         |       |                                                                                                                                                                                                                                                                                                      |                                 |
| Title                         | 1     | Identify the report as a systematic review.                                                                                                                                                                                                                                                          | Title                           |
| ABSTRACT                      |       |                                                                                                                                                                                                                                                                                                      |                                 |
| Abstract                      | 2     | See the PRISMA 2020 for Abstracts checklist.                                                                                                                                                                                                                                                         | Abstract                        |
| INTRODUCTION                  |       |                                                                                                                                                                                                                                                                                                      |                                 |
| Rationale                     | 3     | Describe the rationale for the review in the context of existing knowledge.                                                                                                                                                                                                                          | Introduction                    |
| Objectives                    | 4     | Provide an explicit statement of the objective(s) or question(s) the review addresses.                                                                                                                                                                                                               | Introduction                    |
| METHODS                       |       |                                                                                                                                                                                                                                                                                                      |                                 |
| Eligibility criteria          | 5     | Specify the inclusion and exclusion criteria for the review and how studies were grouped for the syntheses.                                                                                                                                                                                          | Methods                         |
| Information sources           | 6     | Specify all databases, registers, websites, organizations, reference lists and other sources searched or consulted to identify studies. Specify the date when each source was last searched or consulted.                                                                                            | Methods                         |
| Search strategy               | 7     | Present the full search strategies for all databases, registers, and websites, including any filters and limits used.                                                                                                                                                                                | Methods                         |
| Selection process             | 8     | Specify the methods used to decide whether a study met the inclusion criteria of the review, including how many reviewers screened each record and each report retrieved, whether they worked independently, and if applicable, details of automation tools used in the process.                     | Methods                         |
| Data collection process       | 9     | Specify the methods used to collect data from reports, including how many reviewers collected data from each report, whether they worked independently, any processes for obtaining or confirming data from study investigators, and if applicable, details of automation tools used in the process. | Methods                         |
| Data items                    | 10a   | List and define all outcomes for which data were sought. Specify whether all results that were compatible with each outcome domain in each study were sought (e.g. for all measures, time points, analyses), and if not, the methods used to decide which results to collect.                        | Methods,                        |
|                               | 10b   | List and define all other variables for which data were sought (e.g. participant and intervention characteristics, funding sources). Describe any assumptions made about any missing or unclear information.                                                                                         | Methods                         |
| Study risk of bias assessment | 11    | Specify the methods used to assess risk of bias in the included studies, including details of the tool(s) used, how many reviewers assessed each study and whether they worked independently, and if applicable, details of automation tools used in the process.                                    | Methods                         |
| Effect measures               | 12    | Specify for each outcome the effect measure(s) (e.g. risk ratio, mean difference) used in the synthesis or presentation of results.                                                                                                                                                                  | Methods                         |
| Synthesis methods             | 13a   | Describe the processes used to decide which studies were eligible for each synthesis (e.g. tabulating the study intervention characteristics and comparing against the planned groups for each synthesis (item #5)).                                                                                 | Methods                         |
|                               | 13b   | Describe any methods required to prepare the data for presentation or synthesis, such as handling of missing summary statistics, or data conversions.                                                                                                                                                | Methods                         |
|                               | 13c   | Describe any methods used to tabulate or visually display results of individual studies and syntheses.                                                                                                                                                                                               | Methods                         |
|                               | 13d   | Describe any methods used to synthesize results and provide a rationale for the choice(s). If meta-analysis was performed, describe the model(s), method(s) to identify the presence and extent of statistical heterogeneity, and software package(s) used.                                          | Methods                         |
|                               | 13e   | Describe any methods used to explore possible causes of heterogeneity among study results (e.g. subgroup analysis, meta-regression).                                                                                                                                                                 | Methods                         |
|                               | 13f   | Describe any sensitivity analyses conducted to assess robustness of the synthesized results.                                                                                                                                                                                                         | Methods                         |
| Reporting bias assessment     | 14    | Describe any methods used to assess risk of bias due to missing results in a synthesis (arising from reporting biases).                                                                                                                                                                              | Methods                         |
| Certainty assessment          | 15    | Describe any methods used to assess certainty (or confidence) in the body of evidence for an outcome.                                                                                                                                                                                                | Not applicable                  |

| Section and Topic                              | Item# | Checklist item                                                                                                                                                                                                                                                                       | Location where item is reported |
|------------------------------------------------|-------|--------------------------------------------------------------------------------------------------------------------------------------------------------------------------------------------------------------------------------------------------------------------------------------|---------------------------------|
| RESULTS                                        |       |                                                                                                                                                                                                                                                                                      |                                 |
| Study selection                                | 16a   | Describe the results of the search and selection process, from the number of records identified in the search to the number of studies included in the review, ideally using a flow diagram.                                                                                         | Results, Figure 1               |
|                                                | 16b   | Cite studies that might appear to meet the inclusion criteria, but which were excluded, and explain why they were excluded.                                                                                                                                                          | Table S3                        |
| Study characteristics                          | 17    | Cite each included study and present its characteristics.                                                                                                                                                                                                                            | Results, Table 1-3              |
| Risk of bias in studies                        | 18    | Present assessments of risk of bias for each included study.                                                                                                                                                                                                                         | Figure 2, Table S4-5            |
| Results of individual studies                  | 19    | For all outcomes, present, for each study: (a) summary statistics for each group (where appropriate) and (b) an effect estimate and its precision (e.g. confidence/credible interval), ideally using structured tables or plots.                                                     | Results, Figure 3               |
| Results of syntheses                           | 20a   | For each synthesis, briefly summarise the characteristics and risk of bias among contributing studies.                                                                                                                                                                               | Results, Table S4-5             |
|                                                | 20b   | Present results of all statistical syntheses conducted. If meta-analysis was done, present for each the summary estimate and its precision (e.g. confidence/credible interval) and measures of statistical heterogeneity. If comparing groups, describe the direction of the effect. | Results, Figure 3-4, Table 4    |
|                                                | 20c   | Present results of all investigations of possible causes of heterogeneity among study results.                                                                                                                                                                                       | Results, Figure 3-4, Table 4    |
|                                                | 20d   | Present results of all sensitivity analyses conducted to assess the robustness of the synthesized results.                                                                                                                                                                           | Figure S1                       |
| Reporting biases                               | 21    | Present assessments of risk of bias due to missing results (arising from reporting biases) for each synthesis assessed.                                                                                                                                                              | Figure S2                       |
| Certainty of evidence                          | 22    | Present assessments of certainty (or confidence) in the body of evidence for each outcome assessed.                                                                                                                                                                                  | Not applicable                  |
| DISCUSSION                                     |       |                                                                                                                                                                                                                                                                                      |                                 |
| Discussion                                     | 23a   | Provide a general interpretation of the results in the context of other evidence.                                                                                                                                                                                                    | Discussion                      |
|                                                | 23b   | Discuss any limitations of the evidence included in the review.                                                                                                                                                                                                                      | Discussion                      |
|                                                | 23c   | Discuss any limitations of the review processes used.                                                                                                                                                                                                                                | Discussion                      |
|                                                | 23d   | Discuss implications of the results for practice, policy, and future research.                                                                                                                                                                                                       | Discussion                      |
| OTHER INFORMATION                              |       |                                                                                                                                                                                                                                                                                      |                                 |
| Registration and protocol                      | 24a   | Provide registration information for the review, including register name and registration number, or state that the review was not registered.                                                                                                                                       | Methods                         |
|                                                | 24b   | Indicate where the review protocol can be accessed, or state that a protocol was not prepared.                                                                                                                                                                                       | Methods                         |
|                                                | 24c   | Describe and explain any amendments to information provided at registration or in the protocol.                                                                                                                                                                                      | Not applicable                  |
| Support                                        | 25    | Describe sources of financial or non-financial support for the review, and the role of the funders or sponsors in the review.                                                                                                                                                        | Funding                         |
| Competing interests                            | 26    | Declare any competing interests of review authors.                                                                                                                                                                                                                                   | Conflict of interest            |
| Availability of data, code and other materials | 27    | Report which of the following are publicly available and where they can be found: template data collection forms; data extracted from included studies; data used for all analyses; analytic code; any other materials used in the review.                                           | Result                          |

**Table S2.** Keywords and search results in different databases

| Database       | Keyword                                                                                                                                                                                                                                                                                                                                                                                                                                         | Date      | Results |
|----------------|-------------------------------------------------------------------------------------------------------------------------------------------------------------------------------------------------------------------------------------------------------------------------------------------------------------------------------------------------------------------------------------------------------------------------------------------------|-----------|---------|
| PubMed         | ((Nasopharyngeal Neoplasms OR Nasopharyngeal Cancer OR Nasopharyngeal Carcinoma OR Nasopharyngeal Tumors) AND (MRI OR magnetic resonance imaging OR MR ) AND (machine learning OR deep learning OR radiomics OR texture analysis) AND (overall survival OR disease-free survival OR progression-free survival OR local recurrence OR local control OR local failure OR survival OR prognosis OR prediction OR treatment outcome OR prognostic)) | 2024/2/17 | 122     |
| Embase         | ((Nasopharyngeal Neoplasms OR Nasopharyngeal Cancer OR Nasopharyngeal Carcinoma OR Nasopharyngeal Tumors) AND (MRI OR magnetic resonance imaging OR MR ) AND (machine learning OR deep learning OR radiomics OR texture analysis) AND (overall survival OR disease-free survival OR progression-free survival OR local recurrence OR local control OR local failure OR survival OR prognosis OR prediction OR treatment outcome OR prognostic)) | 2024/2/17 | 237     |
| Web of Science | ((Nasopharyngeal Neoplasms OR Nasopharyngeal Cancer OR Nasopharyngeal Carcinoma OR Nasopharyngeal Tumors) AND (MRI OR magnetic resonance imaging OR MR ) AND (machine learning OR deep learning OR radiomics OR texture analysis) AND (overall survival OR disease-free survival OR progression-free survival OR local recurrence OR local control OR local failure OR survival OR prognosis OR prediction OR treatment outcome OR prognostic)) | 2024/2/17 | 136     |

**Table S3** Excluded article and reason.

| Article                                                                                                                                                                                                                        | Exclusion reason                                    |
|--------------------------------------------------------------------------------------------------------------------------------------------------------------------------------------------------------------------------------|-----------------------------------------------------|
| Early prediction of long-term survival of patients with nasopharyngeal carcinoma by multi-parameter MRI radiomics                                                                                                              | Insufficient detail of c-index                      |
| Multi-omics fusion with soft labeling for enhanced prediction of distant metastasis in nasopharyngeal carcinoma patients after radiotherapy                                                                                    | Outcome insufficient for quantitative meta-analysis |
| Significance of radiologic extranodal extension in locoregionally advanced nasopharyngeal carcinoma with lymph node metastasis: a comprehensive nomogram                                                                       | Not radiomics                                       |
| Deep Learning-Based Multi-Modality Segmentation of Primary Gross Tumor Volume in CT and MRI for Nasopharyngeal Carcinoma                                                                                                       | Outcome does not relate to interest                 |
| Integrative Scoring System for Survival Prediction in Patients With Locally Advanced Nasopharyngeal Carcinoma: A Retrospective Multicenter Study                                                                               | Insufficient detail of c-index                      |
| Proposed prognostic subgroups and facilitated clinical decision-making for additional locoregional radiotherapy in de novo metastatic nasopharyngeal carcinoma: a retrospective study based on recursive partitioning analysis | Outcome insufficient for quantitative meta-analysis |
| A deep learning MRI-based signature may provide risk-stratification strategies for nasopharyngeal carcinoma                                                                                                                    | Deep learning based radiomics                       |

|                                                                                                                                                                                                              |                                                     |
|--------------------------------------------------------------------------------------------------------------------------------------------------------------------------------------------------------------|-----------------------------------------------------|
| Intra- and peritumoral MRI radiomics assisted in predicting radiochemotherapy response in metastatic cervical lymph nodes of nasopharyngeal cancer                                                           | Insufficient detail of c-index                      |
| Multimodality radiomics analysis based on [18F]FDG PET/CT imaging and multisequence MRI: application to nasopharyngeal carcinoma prognosis                                                                   | Not MRI                                             |
| Adjuvant chemotherapy or no adjuvant chemotherapy? A prediction model for the risk stratification of recurrence or metastasis of nasopharyngeal carcinoma combining MRI radiomics with clinical factors      | Insufficient detail of c-index                      |
| MRI-based clinical radiomics nomogram may predict the early response after concurrent chemoradiotherapy in locally advanced nasopharyngeal carcinoma                                                         | Insufficient detail of c-index                      |
| Delta-Radiomics Guides Adaptive De-Intensification after Induction Chemotherapy in Locoregionally Advanced Nasopharyngeal Carcinoma in the IMRT Era                                                          | Delta radiomics                                     |
| Radiomic analysis of MRI for prediction of response to induction chemotherapy in nasopharyngeal carcinoma patients                                                                                           | Insufficient detail of c-index                      |
| Explainable machine learning via intra-tumoral radiomics feature mapping for patient stratification in adjuvant chemotherapy for locoregionally advanced nasopharyngeal carcinoma                            | Outcome does not relate to interest                 |
| A nomogram model based on pre-treatment and post-treatment MR imaging radiomics signatures: application to predict progression-free survival for nasopharyngeal carcinoma                                    | Outcome insufficient for quantitative meta-analysis |
| Deep learning-based precise prediction and early detection of radiation-induced temporal lobe injury for nasopharyngeal carcinoma                                                                            | Outcome does not relate to interest                 |
| Artificial intelligence aided precise detection of local recurrence on MRI for nasopharyngeal carcinoma: a multicenter cohort study                                                                          | Insufficient detail of c-index                      |
| Deep learning-based accurate delineation of primary gross tumor volume of nasopharyngeal carcinoma on heterogeneous magnetic resonance imaging: A large-scale and multi-center study                         | Outcome does not relate to interest                 |
| Prognosis Forecast of Re-Irradiation for Recurrent Nasopharyngeal Carcinoma Based on Deep Learning Multi-Modal Information Fusion                                                                            | Insufficient detail of c-index                      |
| Predictive function of tumor burden-incorporated machine-learning algorithms for overall survival and their value in guiding management decisions in patients with locally advanced nasopharyngeal carcinoma | Deep learning based radiomics                       |
| Radiomic signatures reveal multiscale intratumor heterogeneity associated with tissue tolerance and survival in re-irradiated nasopharyngeal carcinoma: a multicenter study                                  | Insufficient detail of c-index                      |
| Prognostic model on overall survival in elderly nasopharyngeal carcinoma patients: a recursive partitioning analysis identifying pre-treatment risk stratification                                           | Outcome insufficient for quantitative meta-analysis |
| A Rulefit-based prognostic analysis using structured MRI report to select potential beneficiaries from induction chemotherapy in advanced nasopharyngeal carcinoma: A dual-centre study                      | Not radiomics                                       |
| Automatic tumor segmentation and metachronous single-organ metastasis prediction of nasopharyngeal carcinoma patients based on multi-sequence magnetic resonance imaging                                     | Insufficient detail of c-index                      |
| Performance of Pretreatment MRI-Based Radiomics in Recombinant Human Endostatin Plus Concurrent Chemoradiotherapy Response Prediction in Nasopharyngeal Carcinoma: A Retrospective Study                     | Insufficient detail of c-index                      |

|                                                                                                                                                                                                         |                                                     |
|---------------------------------------------------------------------------------------------------------------------------------------------------------------------------------------------------------|-----------------------------------------------------|
| Deep learning for the prediction of residual tumor after radiotherapy and treatment decision-making in patients with nasopharyngeal carcinoma based on magnetic resonance imaging                       | Insufficient detail of c-index                      |
| Deep Learning for Predicting Distant Metastasis in Patients with Nasopharyngeal Carcinoma Based on Pre-Radiotherapy Magnetic Resonance Imaging                                                          | Outcome insufficient for quantitative meta-analysis |
| Intravoxel incoherent motion radiomics nomogram for predicting tumor treatment responses in nasopharyngeal carcinoma                                                                                    | Outcome does not relate to interest                 |
| Deep learning-based recurrence detector on magnetic resonance scans in nasopharyngeal carcinoma: A multicenter study                                                                                    | Insufficient detail of c-index                      |
| MRI-based radiomics models can improve prognosis prediction for nasopharyngeal carcinoma with neoadjuvant chemotherapy                                                                                  | Outcome insufficient for quantitative meta-analysis |
| Radiomics for Predicting Response of Neoadjuvant Chemotherapy in Nasopharyngeal Carcinoma: A Systematic Review and Meta-Analysis                                                                        | Review article                                      |
| Establishment and validation of novel MRI radiomic feature-based prognostic models to predict progression-free survival in locally advanced rectal cancer                                               | Not nasopharyngeal cancer                           |
| Prediction of Response to Induction Chemotherapy Plus Concurrent Chemoradiotherapy for Nasopharyngeal Carcinoma Based on MRI Radiomics and Delta Radiomics: A Two-Center Retrospective Study            | Outcome insufficient for quantitative meta-analysis |
| Extraction parameter optimized radiomics for neoadjuvant chemotherapy response prognosis in advanced nasopharyngeal carcinoma                                                                           | Insufficient detail of c-index                      |
| MRI-based random survival Forest model improves prediction of progression-free survival to induction chemotherapy plus concurrent Chemoradiotherapy in Locoregionally Advanced nasopharyngeal carcinoma | Outcome insufficient for quantitative meta-analysis |
| A Clinical-Radiomics Nomogram Based on Magnetic Resonance Imaging for Predicting Progression-Free Survival After Induction Chemotherapy in Nasopharyngeal Carcinoma                                     | Outcome insufficient for quantitative meta-analysis |
| MRI-Based Back Propagation Neural Network Model as a Powerful Tool for Predicting the Response to Induction Chemotherapy in Locoregionally Advanced Nasopharyngeal Carcinoma                            | Insufficient detail of c-index                      |
| Dynamic contrast-enhanced magnetic resonance imaging-based radiomics for the prediction of progression-free survival in advanced nasopharyngeal carcinoma                                               | Overlapping dataset                                 |
| Deep learning for locally advanced nasopharyngeal carcinoma prognostication based on pre- and post-treatment MRI                                                                                        | Deep learning based radiomics                       |
| Multi-Organ Omics-Based Prediction for Adaptive Radiation Therapy Eligibility in Nasopharyngeal Carcinoma Patients Undergoing Concurrent Chemoradiotherapy                                              | Insufficient detail of c-index                      |
| Radiomics based on pretreatment MRI for predicting distant metastasis of nasopharyngeal carcinoma: A preliminary study                                                                                  | Insufficient detail of c-index                      |
| Deep learning-enabled precise recurrence detection in nasopharyngeal carcinoma: A multicentre study                                                                                                     | Deep learning based radiomics                       |
| Machine Learning Based on MRI DWI Radiomics Features for Prognostic Prediction in Nasopharyngeal Carcinoma                                                                                              | Insufficient detail of c-index                      |
| MRI-based radiomics nomogram for predicting temporal lobe injury after radiotherapy in nasopharyngeal carcinoma                                                                                         | Outcome does not relate to interest                 |
| A diagnosis model in nasopharyngeal carcinoma based on PET/MRI radiomics and semiquantitative parameters                                                                                                | Not MRI                                             |

|                                                                                                                                                                                                   |                                                     |
|---------------------------------------------------------------------------------------------------------------------------------------------------------------------------------------------------|-----------------------------------------------------|
| Integration of MRI-Based Radiomics Features, Clinicopathological Characteristics, and Blood Parameters: A Nomogram Model for Predicting Clinical Outcome in Nasopharyngeal Carcinoma              | Insufficient detail of c-index                      |
| Add-on individualizing prediction of nasopharyngeal carcinoma using deep-learning based on MRI: A multicentre, validation study                                                                   | Deep learning based radiomics                       |
| A MRI-based radiomics model predicting radiation-induced temporal lobe injury in nasopharyngeal carcinoma                                                                                         | Outcome does not relate to interest                 |
| Baseline MRI-based radiomics model assisted predicting disease progression in nasopharyngeal carcinoma patients with complete response after treatment                                            | Insufficient detail of c-index                      |
| A deep learning-based radiomic nomogram for prognosis and treatment decision in advanced nasopharyngeal carcinoma: A multicentre study                                                            | Deep learning based radiomics                       |
| MRI-Based Deep-Learning Model for Distant Metastasis-Free Survival in Locoregionally Advanced Nasopharyngeal Carcinoma                                                                            | Insufficient detail of c-index                      |
| The usefulness of pretreatment mr-based radiomics on early response of neoadjuvant chemotherapy in patients with locally advanced nasopharyngeal carcinoma                                        | Insufficient detail of c-index                      |
| MRI-based radiomics as response predictor to radiochemotherapy for metastatic cervical lymph node in nasopharyngeal carcinoma                                                                     | Insufficient detail of c-index                      |
| A Prognostic Predictive System Based on Deep Learning for Locoregionally Advanced Nasopharyngeal Carcinoma                                                                                        | Deep learning based radiomics                       |
| Unambiguous advanced radiologic extranodal extension determined by MRI predicts worse outcomes in nasopharyngeal carcinoma: Potential improvement for future editions of N category systems       | Outcome insufficient for quantitative meta-analysis |
| Whole-Tumor Histogram and Texture Imaging Features on Magnetic Resonance Imaging Combined With Epstein-Barr Virus Status to Predict Disease Progression in Patients With Nasopharyngeal Carcinoma | Insufficient detail of c-index                      |
| A Gene-Expression Predictor for Efficacy of Induction Chemotherapy in Locoregionally Advanced Nasopharyngeal Carcinoma                                                                            | Not radiomics                                       |
| Early risk-assessment of patients with nasopharyngeal carcinoma: the added prognostic value of MR-based radiomics                                                                                 | Insufficient detail of c-index                      |
| Predictive Value of a Combined Model Based on Pre-Treatment and Mid-Treatment MRI-Radiomics for Disease Progression or Death in Locally Advanced Nasopharyngeal Carcinoma                         | Insufficient detail of c-index                      |
| Application Value of Magnetic Resonance Radiomics and Clinical Nomograms in Evaluating the Sensitivity of Neoadjuvant Chemotherapy for Nasopharyngeal Carcinoma                                   | Insufficient detail of c-index                      |
| Magnetic resonance imaging-based radiogenomics analysis for predicting prognosis and gene expression profile in advanced nasopharyngeal carcinoma (vol 43, pg 3730, 2021)                         | Overlapping dataset                                 |
| An interpretable machine learning prognostic system for locoregionally advanced nasopharyngeal carcinoma based on tumor burden features                                                           | Not radiomics                                       |
| Prognostic and predictive value of radiomics features at MRI in nasopharyngeal carcinoma                                                                                                          | Outcome insufficient for quantitative meta-analysis |
| A deep learning MR-based radiomic nomogram may predict survival for nasopharyngeal carcinoma patients with stage T3N1M0                                                                           | Deep learning based radiomics                       |
| Deep learning-based prognosis prediction in T3N1 nasopharyngeal carcinoma patients treated with induction chemotherapy followed by concurrent chemoradiotherapy                                   | Deep learning based radiomics                       |



|                                                                                                                                                                                                            |                                                     |
|------------------------------------------------------------------------------------------------------------------------------------------------------------------------------------------------------------|-----------------------------------------------------|
| MRI-based radiomics nomogram may predict the response to induction chemotherapy and survival in locally advanced nasopharyngeal carcinoma                                                                  | Outcome insufficient for quantitative meta-analysis |
| Pretreatment MRI-Derived Radiomics May Evaluate the Response of Different Induction Chemotherapy Regimens in Locally advanced Nasopharyngeal Carcinoma                                                     | Insufficient detail of c-index                      |
| Multi-sequence MRI based Radiomics Model in Predicting Efficacy of Neoadjuvant Chemotherapy for Nasopharyngeal Carcinoma                                                                                   | Insufficient detail of c-index                      |
| A predictive model of radiation-related fibrosis based on the radiomic features of magnetic resonance imaging and computed tomography                                                                      | Outcome does not relate to interest                 |
| Predicting Progression-Free Survival Using MRI-Based Radiomics for Patients With Nonmetastatic Nasopharyngeal Carcinoma                                                                                    | Overlapping dataset                                 |
| Deep learning for risk prediction in patients with nasopharyngeal carcinoma using multi-parametric MRIs                                                                                                    | Outcome insufficient for quantitative meta-analysis |
| Radiomics Analysis and Correlation With Metabolic Parameters in Nasopharyngeal Carcinoma Based on PET/MR Imaging                                                                                           | Not MRI                                             |
| Machine Learning Analysis of Image Data Based on Detailed MR Image Reports for Nasopharyngeal Carcinoma Prognosis                                                                                          | Insufficient detail of c-index                      |
| Exploring MRI based radiomics analysis of intratumoral spatial heterogeneity in locally advanced nasopharyngeal carcinoma treated with intensity modulated radiotherapy                                    | Outcome does not relate to interest                 |
| Radiomics on multi-modalities MR sequences can subtype patients with non-metastatic nasopharyngeal carcinoma (NPC) into distinct survival subgroups (vol 29, pg 1211, 2019)                                | Overlapping dataset                                 |
| Radiomic Nomogram: Pretreatment Evaluation of Local Recurrence in Nasopharyngeal Carcinoma based on MR Imaging                                                                                             | Without standalone radiomics result                 |
| Development and validation of a magnetic resonance imaging-based model for the prediction of distant metastasis before initial treatment of nasopharyngeal carcinoma: A retrospective cohort study         | Insufficient detail of c-index                      |
| Pretreatment Prediction of Adaptive Radiation Therapy Eligibility Using MRI-Based Radiomics for Advanced Nasopharyngeal Carcinoma Patients                                                                 | Insufficient detail of c-index                      |
| A multidimensional nomogram combining overall stage, dose volume histogram parameters and radiomics to predict progression-free survival in patients with locoregionally advanced nasopharyngeal carcinoma | Without standalone radiomics result                 |
| Magnetic Resonance Imaging Texture Analysis Predicts Recurrence in Patients With Nasopharyngeal Carcinoma                                                                                                  | Insufficient detail of c-index                      |
| Deep learning in nasopharyngeal carcinoma: A retrospective cohort study of 3D convolutional neural networks on magnetic resonance imaging                                                                  | Outcome does not relate to interest                 |
| Predictive value of pretreatment MRI texture analysis in patients with primary nasopharyngeal carcinoma                                                                                                    | Without independent validation                      |
| Radio-Transcriptomic Phenotypes Predict Radioresistance in Nasopharyngeal Carcinoma                                                                                                                        | Outcome does not relate to interest                 |
| Comparison of radiomics tools for image analyses and clinical prediction in nasopharyngeal carcinoma                                                                                                       | Outcome does not relate to interest                 |
| Use of radiomics in the recurrence patterns after IMRT for head and neck cancer: a preliminary study                                                                                                       | Outcome insufficient for quantitative meta-analysis |
| Radiomics model to predict early progression of nonmetastatic nasopharyngeal carcinoma after intensity modulation radiation therapy: A multicenter study                                                   | Insufficient detail of c-index                      |

|                                                                                                                                                                                                         |                                                     |
|---------------------------------------------------------------------------------------------------------------------------------------------------------------------------------------------------------|-----------------------------------------------------|
| Development and validation of a novel MR imaging predictor of response to induction chemotherapy in locoregionally advanced nasopharyngeal cancer: a randomized controlled trial substudy (NCT01245959) | Outcome does not relate to interest                 |
| Development and validation of M1 substages for previously untreated metastatic nasopharyngeal carcinoma                                                                                                 | Not radiomics                                       |
| Multiparametric MRI Based Radiomics for the Prediction of Induction Chemotherapy Response and Survival in Locally Advanced Nasopharyngeal Carcinoma                                                     | Outcome insufficient for quantitative meta-analysis |
| Pretreatment MR imaging radiomics signatures for response prediction to induction chemotherapy in patients with nasopharyngeal carcinoma                                                                | Insufficient detail of c-index                      |
| Predicting chemoradiotherapy response of nasopharyngeal carcinoma using texture features based on intravoxel incoherent motion diffusion-weighted imaging                                               | No combination of features to the overall model     |
| Use of Radiomics Combined With Machine Learning Method in the Recurrence Patterns After Intensity-Modulated Radiotherapy for Nasopharyngeal Carcinoma: A Preliminary Study                              | Outcome insufficient for quantitative meta-analysis |
| Advanced nasopharyngeal carcinoma: pre-treatment prediction of progression based on multi-parametric MRI radiomics                                                                                      | Insufficient detail of c-index                      |
| Radiomic machine-learning classifiers for prognostic biomarkers of advanced nasopharyngeal carcinoma                                                                                                    | Insufficient detail of c-index                      |
| Association of MRI radiomics feature changes with treatment outcome for radiotherapy of nasopharyngeal carcinoma                                                                                        | Outcome does not relate to interest                 |
| Exploration and validation of radiomics signature as an independent prognostic biomarker in stage III-IVb nasopharyngeal carcinoma                                                                      | Outcome does not relate to interest                 |
| MRI based radiomics signature, a quantitative prognostic biomarker for nasopharyngeal carcinoma                                                                                                         | Overlapping dataset                                 |
| Use of texture analysis based on contrast-enhanced MRI to predict treatment response to chemoradiotherapy in nasopharyngeal carcinoma                                                                   | Outcome insufficient for quantitative meta-analysis |
| Classification of Progression Free Survival with Nasopharyngeal Carcinoma Tumors                                                                                                                        | Outcome insufficient for quantitative meta-analysis |

**Table S4** Details of QUIPS assessment

| Author                            | Study Participant | Study attribution | Prognosis factor meas-<br>urement | Outcome measurement | Study confounding | Statistical analyses and<br>reporting |
|-----------------------------------|-------------------|-------------------|-----------------------------------|---------------------|-------------------|---------------------------------------|
| Khongwirotphan et al. (2024) [14] | Low               | Low               | Low                               | Low                 | Unclear           | Low                                   |
| Qihao Zhang et al. (2023) [15]    | Low               | Low               | Low                               | Low                 | Unclear           | Low                                   |
| Jiang Zhang et al. (2023) [16]    | Low               | Low               | Low                               | Low                 | High              | Low                                   |
| Li et al. (2023) [17]             | Low               | Low               | Low                               | Low                 | Unclear           | Low                                   |
| Hu et al. (2023) [18]             | Low               | Low               | Low                               | Low                 | High              | Low                                   |
| Shen et al. (2022) [19]           | Low               | Unclear           | Low                               | Low                 | Low               | Low                                   |
| Liu et al. (2022) [20]            | Low               | Low               | Low                               | Low                 | Low               | Low                                   |
| Li et al. (2022) [21]             | Low               | Low               | Low                               | Low                 | Low               | Low                                   |
| Jiang et al. (2022) [22]          | Low               | Low               | Low                               | Low                 | Low               | Low                                   |
| Gao et al. (2021) [23]            | Low               | Low               | Low                               | Low                 | Low               | Low                                   |
| Zhang et al. (2020) [24]          | Low               | Low               | Low                               | Low                 | Low               | Low                                   |
| Bologna et al. (2020) [25]        | Low               | Unclear           | Low                               | Low                 | Unclear           | Low                                   |
| Zhang et al. (2019) [26]          | Low               | Low               | Low                               | Low                 | High              | Low                                   |
| Ming et al. (2019) [27]           | Low               | Low               | Low                               | Low                 | Low               | Low                                   |
| Zhang et al. (2017) [28]          | Low               | Low               | Low                               | Low                 | Low               | Low                                   |

Table S5 Details of radiomic quality score.

| Author                            | Image protocol quality | Multiple segmentation | Phantom study on all scanner | Imaging at multiple time points | Feature reduction or adjustment for multiple testing | Multivariable analysis with non-radiomics features | Detect and discuss biological correlates | Cut-off analyses | Discrimination statistics | Calibration statistics | Prospective study registered in a trial database | Validation | Comparison to 'gold standard' | Potential clinical utility | Cost-effectiveness analysis | Open science and data | Total |
|-----------------------------------|------------------------|-----------------------|------------------------------|---------------------------------|------------------------------------------------------|----------------------------------------------------|------------------------------------------|------------------|---------------------------|------------------------|--------------------------------------------------|------------|-------------------------------|----------------------------|-----------------------------|-----------------------|-------|
| Khongwirotphan et al. (2024) [14] | 1                      | 1                     | 0                            | 0                               | 3                                                    | 1                                                  | 0                                        | 1                | 1                         | 0                      | 0                                                | 2          | 0                             | 0                          | 0                           | 1                     | 11    |
| Qihao Zhang et al. (2023) [15]    | 1                      | 0                     | 0                            | 0                               | 3                                                    | 0                                                  | 1                                        | 1                | 1                         | 0                      | 0                                                | 2          | 0                             | 0                          | 0                           | 0                     | 9     |
| Jiang Zhang et al. (2023) [16]    | 1                      | 0                     | 0                            | 0                               | 3                                                    | 0                                                  | 0                                        | 1                | 1                         | 0                      | 0                                                | 3          | 0                             | 0                          | 0                           | 1                     | 10    |
| Li et al. (2023) [17]             | 1                      | 0                     | 0                            | 0                               | 3                                                    | 0                                                  | 1                                        | 1                | 1                         | 0                      | 0                                                | 2          | 0                             | 0                          | 0                           | 0                     | 9     |
| Hu et al. (2023) [18]             | 1                      | 0                     | 0                            | 0                               | 3                                                    | 1                                                  | 0                                        | 1                | 1                         | 0                      | 0                                                | 4          | 0                             | 0                          | 0                           | 2                     | 13    |
| Shen et al. (2022) [19]           | 0                      | 1                     | 0                            | 1                               | 3                                                    | 0                                                  | 0                                        | 1                | 1                         | 1                      | 0                                                | 5          | 1                             | 1                          | 0                           | 0                     | 15    |
| Liu et al. (2022) [20]            | 1                      | 0                     | 0                            | 0                               | 3                                                    | 0                                                  | 0                                        | 1                | 1                         | 1                      | 0                                                | 2          | 0                             | 1                          | 0                           | 1                     | 11    |
| Li et al. (2022) [21]             | 1                      | 0                     | 0                            | 0                               | 3                                                    | 1                                                  | 0                                        | 1                | 1                         | 1                      | 0                                                | 2          | 0                             | 1                          | 0                           | 0                     | 11    |
| Jiang et al. (2022) [22]          | 1                      | 1                     | 0                            | 1                               | 3                                                    | 1                                                  | 0                                        | 1                | 1                         | 1                      | 0                                                | 2          | 0                             | 1                          | 0                           | 1                     | 14    |
| Gao et al. (2021) [23]            | 1                      | 1                     | 0                            | 0                               | 3                                                    | 1                                                  | 0                                        | 1                | 1                         | 1                      | 0                                                | 2          | 0                             | 0                          | 0                           | 0                     | 11    |
| Zhang et al. (2020) [24]          | 1                      | 0                     | 0                            | 0                               | 3                                                    | 1                                                  | 1                                        | 1                | 1                         | 1                      | 0                                                | 3          | 0                             | 0                          | 0                           | 0                     | 12    |
| Bologna et al. (2020) [25]        | 1                      | 0                     | 0                            | 0                               | 3                                                    | 1                                                  | 0                                        | 1                | 1                         | 0                      | 0                                                | 2          | 0                             | 0                          | 0                           | 0                     | 9     |
| Zhang et al. (2019) [26]          | 1                      | 1                     | 0                            | 0                               | 3                                                    | 1                                                  | 0                                        | 1                | 1                         | 1                      | 0                                                | 3          | 0                             | 0                          | 0                           | 0                     | 12    |
| Ming et al. (2019) [27]           | 1                      | 1                     | 0                            | 0                               | 3                                                    | 1                                                  | 0                                        | 1                | 1                         | 0                      | 0                                                | 2          | 0                             | 0                          | 0                           | 0                     | 10    |
| Zhang et al. (2017) [28]          | 1                      | 1                     | 0                            | 0                               | 3                                                    | 1                                                  | 0                                        | 1                | 1                         | 1                      | 0                                                | 2          | 0                             | 0                          | 0                           | 0                     | 11    |
